RESEARCH ARTICLE

# Inhibition of the Prostaglandin Transporter PGT Lowers Blood Pressure in Hypertensive Rats and Mice

Yuling Chi<sup>1</sup>, Jean-Francois Jasmin<sup>2</sup>, Yoshinori Seki<sup>3</sup>, Michael P. Lisanti<sup>4</sup>, Maureen J. Charron<sup>1,3,5</sup>, David J. Lefer<sup>6</sup>, Victor L. Schuster<sup>1,7\*</sup>

**1** Department of Medicine, Albert Einstein College of Medicine, Bronx, NY, United States of America, **2** Department of Pharmaceutical Sciences, University of the Sciences in Philadelphia, Philadelphia, PA, United States of America, **3** Department of Biochemistry, Albert Einstein College of Medicine, Bronx, NY, United States of America, **4** Institute of Cancer Sciences, University of Manchester, Manchester, United Kingdom, **5** Department of Obstetrics & Gynecology and Women's Health, Albert Einstein College of Medicine, Bronx, NY, United States of America, **6** Department of Physiology, Louisiana State University Health Sciences Center, Shreveport, LA, United States of America, **7** Department of Physiology & Biophysics, Albert Einstein College of Medicine, Bronx, NY, United States of America

\* [victor.schuster@einstein.yu.edu](mailto:victor.schuster@einstein.yu.edu)

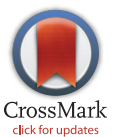

**OPEN ACCESS**

**Citation:** Chi Y, Jasmin J-F, Seki Y, Lisanti MP, Charron MJ, Lefer DJ, et al. (2015) Inhibition of the Prostaglandin Transporter PGT Lowers Blood Pressure in Hypertensive Rats and Mice. PLoS ONE 10(6): e0131735. doi:10.1371/journal.pone.0131735

**Editor:** Zhanjun Jia, University of Utah School of Medicine, UNITED STATES

**Received:** February 24, 2015

**Accepted:** June 4, 2015

**Published:** June 29, 2015

**Copyright:** © 2015 Chi et al. This is an open access article distributed under the terms of the [Creative Commons Attribution License](http://creativecommons.org/licenses/by/4.0/), which permits unrestricted use, distribution, and reproduction in any medium, provided the original author and source are credited.

**Data Availability Statement:** All relevant data are within the paper and in Supporting Information files.

**Funding:** This study was supported by the National Institutes of Health (5R01DK049688) (to VLS) (<http://www.niddk.nih.gov>) and the American Heart Association (0830336N) (to YC) (<http://www.heart.org/HEARTORG/>). The funders had no role in study design, data collection and analysis, decision to publish, or preparation of the manuscript.

**Competing Interests:** The authors have declared that no competing interests exist.

## Abstract

Inhibiting the synthesis of endogenous prostaglandins with nonsteroidal anti-inflammatory drugs exacerbates arterial hypertension. We hypothesized that the converse, i.e., raising the level of endogenous prostaglandins, might have anti-hypertensive effects. To accomplish this, we focused on inhibiting the prostaglandin transporter PGT (SLCO2A1), which is the obligatory first step in the inactivation of several common PGs. We first examined the role of PGT in controlling arterial blood pressure blood pressure using anesthetized rats. The high-affinity PGT inhibitor T26A sensitized the ability of exogenous PGE<sub>2</sub> to lower blood pressure, confirming both inhibition of PGT by T26A and the vasodepressor action of PGE<sub>2</sub>. T26A administered alone to anesthetized rats dose-dependently lowered blood pressure, and did so to a greater degree in spontaneously hypertensive rats than in Wistar-Kyoto control rats. In mice, T26A added chronically to the drinking water increased the urinary excretion and plasma concentration of PGE<sub>2</sub> over several days, confirming that T26A is orally active in antagonizing PGT. T26A given orally to hypertensive mice normalized blood pressure. T26A increased urinary sodium excretion in mice and, when added to the medium bathing isolated mouse aortas, T26A increased the net release of PGE<sub>2</sub> induced by arachidonic acid, inhibited serotonin-induced vasoconstriction, and potentiated vasodilation induced by exogenous PGE<sub>2</sub>. We conclude that pharmacologically inhibiting PGT-mediated prostaglandin metabolism lowers blood pressure, probably by prostaglandin-induced natriuresis and vasodilation. PGT is a novel therapeutic target for treating hypertension.

## Introduction

Prostaglandins (PGs) are 20-carbon fatty acids that signal a broad array of physiological events [1]. PGs are synthesized in a series of steps, beginning with the action of cyclooxygenase-1 (Cox-1) or cyclooxygenase -2 (Cox-2) on arachidonic acid to yield PGH<sub>2</sub>. Specific synthases subsequently generate five types of PGs, namely PGE<sub>2</sub>, PGF<sub>2α</sub>, PGI<sub>2</sub>, PGD<sub>2</sub>, and thromboxane A<sub>2</sub> [2]. Synthesis of all five PGs is blocked by either Cox-1/Cox-2 non-selective inhibitors, the so-called non-steroidal anti-inflammatory drugs (NSAIDs), or by the Cox-2 selective inhibitors, known as coxibs [2].

Although normotensive animals and humans generally experience no change in arterial blood pressure (BP) when administered NSAIDs or coxibs, hypertensive rodents and humans exhibit a further rise in BP when given these agents [3–17]. These data suggest that the aggregate effect of endogenous PGs in hypertension is to lower BP toward normal.

If lowering PGs raises BP in hypertension, then increasing PGs may lower BP in hypertension. One approach to increasing PG levels would be to inhibit their metabolism. PGE<sub>2</sub>, PGF<sub>2α</sub>, PGD<sub>2</sub>, and PGI<sub>2</sub>, but not thromboxane A<sub>2</sub>, are metabolized by the prostaglandin transporter PGT (SLCO2A1), which is obligatory for PG inactivation [18–22]. PGT-mediated PG uptake across the plasma membrane is followed by cytoplasmic enzymatic inactivation [23]. As predicted from this model, global knockout of PGT gene expression in mice results in elevated systemic levels of the representative prostanoid PGE<sub>2</sub>, and in reduced levels of PGE<sub>2</sub> metabolite [24]. Similarly, pharmacological inhibition of PGT using a small-molecule inhibitor prevents the catabolism of both endogenous and exogenous PGE<sub>2</sub> *in vivo* [25].

Based on these findings, we tested the hypothesis that raising systemic PG levels by inhibiting PGT reduces BP in animal models of hypertension.

## Materials and Methods

### Animals

Sprague-Dawley, Wistar-Kyoto, and Spontaneously Hypertensive Rats (SHRs) were purchased from Charles River, Wilmington, MA. C57BL/6 mice, as well as genetically hypertensive mice (BPH/2J) and their matched normotensive mice (BPN/3J), were obtained from the Jackson Laboratory. All experimental procedures done with animals were approved by the Institutional Care and Use Committee at Albert Einstein College of Medicine in accordance with the “Guide for the Care and Use of Laboratory Animals” published by the National Institute of Health.

### Measurement of Arterial Blood Pressure and T26A Half-Life in Anesthetized Rats

Rats weighing 300–350 g were anesthetized with xylazine (10 mg/kg)-ketamine (50 mg/kg) followed by 2000 U heparin (Sigma-Aldrich, St-Louis, MO). After stable anesthesia was obtained, the right jugular vein was isolated and incised, and a polyethylene catheter (PE 50; 0.97 mm OK, 0.58 mm ID) was advanced and positioned in the right ventricle for compound administration. The right carotid artery was isolated and incised, and a millar catheter (SPR-249, Millar Instruments, Houston, TX) was advanced and positioned just above the aortic valve for hemodynamic measurements. The systolic, diastolic, and mean arterial pressures were measured and recorded with the Ponemah P3-Data acquisition system (LDS Test and Measurement, Middleton, WI). BP was immediately recorded after each injection of 100 μL of PGE<sub>2</sub>, or of vehicle (2% DMSO + 2% cremophor for T26A) or T26A, into the jugular vein. Mean BP reduction by PGE<sub>2</sub> is presented as a percentage = 100 x [(minimum BP immediately after PGE<sub>2</sub> injection) – (BP immediately before PGE<sub>2</sub> injection)] / (BP immediately before PGE<sub>2</sub> injection). Mean BP

reduction by T26A is presented as a percentage =  $100 \times [(\text{minimum BP immediately after T26A or vehicle injection}) - (\text{BP immediately before injection})] / (\text{BP immediately before injection})$ .

### Metabolic Recording: Sodium and PGE<sub>2</sub> Measurements

C57BL/6 mice were placed in metabolic cages and equilibrated on regular water and food for 5 days. Thereafter, they were divided into two groups. One group was put on vehicle (2% DMSO + 2% cremophor in the drinking water), and the other was put on 2 mM T26A in the drinking water. Mice were kept in the metabolic cages for another 20 days. Body weight, food intake, liquid intake, and urine volume were recorded daily. Urines were also collected for determination of urinary volume, [PGE<sub>2</sub>], and [Na<sup>+</sup>]. Na<sup>+</sup> concentration in urine was measured by an electrode purchased from Lazar Research Laboratories, Inc., Los Angeles, CA. On day 25 at the end of these experiments, blood was withdrawn from each mouse by cardiac puncture and plasma was collected after centrifugation. [PGE<sub>2</sub>] in urine and plasma were measured using EIA kits from Cayman Chemical (Ann Arbor, MI).

### Long-term BP Measurements in Awake, Unrestrained Mice

Genetically hypertensive mice (BPH/2J) or their matched normotensive mice (BPN/3J) at 12 weeks of age were surgically implanted with PA-C10 radiotelemeter pressure transducers (DSI, St. Paul, MN) in the aorta as previously described [26]. After recovery from surgery, mice were first equilibrated with regular water and food for 4–6 days to obtain stable baselines, and then switched to either vehicle (2% DMSO + 2% cremophor) or 2 mM T26A in the drinking water. Aortic blood pressures (systolic, diastolic, and mean) in the conscious, unrestrained state were recorded every 3 hours by radiotelemetry.

### Measurement of Relaxation or Tension of Mouse Aorta

Mouse aortas were harvested from C57BL/6 animals, cleaned, and cut into rings of 2 mm length. Rings were mounted to a myograph system (Danish Myo Technology A/S, Aarhus, Denmark) and bathed with 5 mL oxygenated and warmed (37°C) physiological salt solution (PSS, mM: NaCl 130, KCl 4.7, KHPO<sub>4</sub> 1.18, MgSO<sub>4</sub> 1.17, CaCl<sub>2</sub> 1.6, NaHCO<sub>3</sub> 14.9, dextrose 5.5, and CaNa<sub>2</sub> EDTA 0.03, 95% O<sub>2</sub>/5% CO<sub>2</sub>). Rings were set at 700 mg passive tension and were then equilibrated for 1 hour and washed every 20 minutes with PSS. Thereafter, various concentrations of T26A (0, 0.2, 1, and 5 μM) were added in 4 separate baths. 5 minutes after incubation with T26A, the rings were contracted with 1 μM serotonin (5-HT). When the contraction reached a plateau, 10 nM PGE<sub>2</sub> was added to induce relaxation. Relaxation from PGE<sub>2</sub> is presented as a percentage =  $100 \times [(\text{tension immediately before PGE}_2 \text{ injection}) - (\text{minimum tension immediately after PGE}_2 \text{ injection})] / (\text{tension immediately before PGE}_2 \text{ injection})$ .

### PGE<sub>2</sub> Measurements in Aorta Buffer

About 20 mg of aortas isolated from mice were incubated in 250 μL buffer (PSS, mM: NaCl 130, KCl 4.7, KHPO<sub>4</sub> 1.18, MgSO<sub>4</sub> 1.17, CaCl<sub>2</sub> 1.6, NaHCO<sub>3</sub> 14.9, dextrose 5.5, and CaNa<sub>2</sub> EDTA 0.03) in a 1.5-mL Eppendorf tube, after which 2 μL of either vehicle (ethanol) or 1 mM T26A was added to the aorta incubation buffer. The final concentration of T26A was 10 μM. At 10 minutes after T26A/vehicle addition, 100 ng arachidonic acid (AA) (Cayman Chemical, Ann Arbor, MI) in 2.5 μL ethanol was added to each tube and aortas were incubated for another 3 or 5 minutes. Then the buffer was collected for PGE<sub>2</sub> measurements using the EIA kits from Cayman Chemical.

### Statistical methods

Differences between data sets were analyzed by two-tailed paired or unpaired t-test as appropriate with a cut-off value for rejection of the null hypothesis of  $p < 0.05$ .

### Results

#### Intravenous T26A Potentiates the Effect of PGE<sub>2</sub> on BP in Anesthetized Sprague-Dawley Rats

We had previously shown that intravenous T26A increases the concentration of arterial PGE<sub>2</sub> in normotensive, anesthetized rats [25]. Because some PGE<sub>2</sub> receptors are vasodepressor and some are vasoconstrictor [27], we extended this earlier determination of [PGE<sub>2</sub>] only to now comprise BP measurements. Using normotensive Sprague-Dawley rats, we first injected T26A or vehicle intravenously, and then injected PGE<sub>2</sub> and measured the BP response at the right carotid artery. As shown in Fig 1A, a 250 ng intravenous bolus of PGE<sub>2</sub> induced a transient

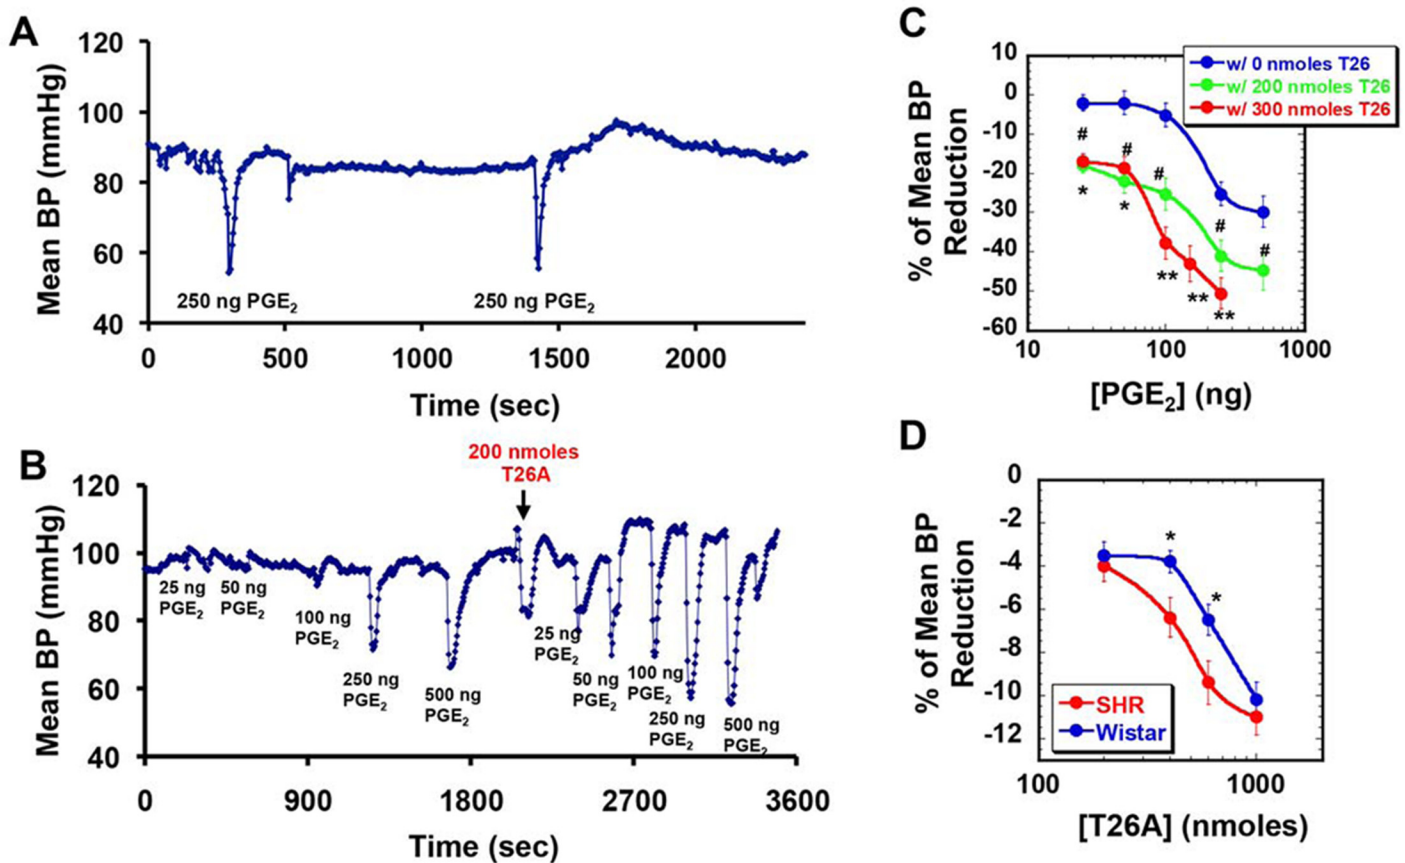

**Fig 1. Intravenous T26A dose-dependently potentiates the hypotensive effect of intravenous PGE<sub>2</sub> in anesthetized normotensive rats, and lowers BP in hypertensive > normotensive rats.** Anesthetized rats were injected intravenously via the femoral vein and arterial BP was monitored continuously via the carotid artery. **A**, BP of a Sprague-Dawley rat after two intravenous PGE<sub>2</sub> injections at the same dose (250 ng). The reduction in BP is highly reproducible and non-additive, indicating that the first dose of PGE<sub>2</sub> has been rapidly metabolized. **B**, BP of a Sprague-Dawley rat measured after each of a series of stepwise intravenous PGE<sub>2</sub> injections (25–500 ng) before and after T26A injection. T26A potentiates the hypotensive effect of each dose of PGE<sub>2</sub>. **C**, Summary of a series of studies performed as in panel B, after injecting 0 nmoles, 200 nmoles, or 300 nmoles of T26A in the second phase. Percent reduction of BP was calculated as per Methods. T26A shifted the dose-response curve of PGE<sub>2</sub> on BP to the left in a dose-dependent fashion. Values are mean  $\pm$  SEM,  $n = 5$  rats for each point. #  $p < 0.05$  for 200 nmoles versus 0 nmoles T26A. \*  $p < 0.05$  and \*  $p < 0.01$  for 300 nmoles versus 0 nmoles T26A. **D**, Effect of intravenous T26A alone on BP of normotensive Wistar-Kyoto rats (blue) and SHR rats (red). Percent reduction of BP was calculated as per Methods. T26A produced a greater fractional reduction in BP in SHR versus Wistar-Kyoto rats. Mean  $\pm$  SEM,  $n = 5$  rats each. \*  $p < 0.05$ .

doi:10.1371/journal.pone.0131735.g001

reduction in arterial BP, an effect that was highly reproducible, since a subsequent injection about 20 minutes later of 250 ng of PGE<sub>2</sub> caused the same degree of BP reduction without any cumulative effect. This result is consistent with the known rapid metabolic inactivation of PGE<sub>2</sub> by PGT [28].

Using a similar protocol, we pre-loaded rats with 300 or 500 nmoles of intravenous T26A and then probed the arterial BP responses to three sequential 100 ng boluses of PGE<sub>2</sub> over the subsequent 50 minutes. These experiments yielded an apparent dynamic half-life for T26A of 40 and 50 minutes, respectively, for the two doses.

In a PGE<sub>2</sub> dose-response protocol (Fig 1B, left portion), incrementally larger doses of intravenous PGE<sub>2</sub> caused dose-dependent transient reductions in arterial BP, with a return to baseline BP between the reductions. We then injected 200 or 300 nmoles of T26A. As shown in Fig 1B, this produced a transient drop in BP, followed by an overshoot and then a return to baseline. The overshoot likely indicates activation of reflex vasoconstrictor tone in response to vasodilator effects (PG-mediated) of T26A.

Repeating the PGE<sub>2</sub> ramp following T26A injection resulted in a significantly augmented effect of any given dose of intravenous PGE<sub>2</sub> on BP (Fig 1B, right portion). The baseline BP drifted upwards at the highest doses of PGE<sub>2</sub> post-T26A, likely representing additional activation of reflex vasoconstrictor tone. It is important to note that the extreme right-hand tracing of Fig 1B represents significant challenges to BP homeostasis by large boluses of vasodilator PGE<sub>2</sub> in the presence of blocked PGE<sub>2</sub> metabolism. These conditions do not reflect a normal physiological state, thus the upward drift in baseline BP at the highest PGE<sub>2</sub> doses does not constitute a negation of the use of pharmacological PGT inhibition for hypertension.

These experiments are summarized in Fig 1C, which demonstrates that T26A significantly shifted the PGE<sub>2</sub> dose response curve to the left, and also that the extent of the left shift is dependent on the dose of T26A.

Taken together, these studies indicate that PGE<sub>2</sub> is a vasodepressor in the rat and that PGT activity modulates the ability of PGE<sub>2</sub> to reduce BP.

## Intravenous T26A Reduces Arterial Blood Pressure to a Greater Degree in Anesthetized SHR Rats than in Wistar-Kyoto Rats

With the intention to evaluate T26A as a prototype antihypertensive, and knowing that PGT inactivates PGs other than PGE<sub>2</sub> [18–22], we measured the effect of intravenous T26A alone on BP in anesthetized rats. Inspection of Fig 1B reveals that T26A induced a transient reduction of BP in normotensive rats. To examine this effect further, we injected various doses of T26A intravenously into both normotensive (Wistar-Kyoto) and hypertensive (SHR) anesthetized rats. As shown in Fig 1D, T26A over the range of 200 to 1000 nmoles (0.15 to 0.75 mg per 300 g rat) dose-dependently reduced arterial BP in both normotensive Wistar-Kyoto and hypertensive SHR rats, with a larger fractional BP reduction in the hypertensive animals. At the maximal dose of 1000 nmoles of T26A, the absolute magnitude change was equivalent for Wistar-Kyoto and SHR. In the absence of detailed binding studies that are beyond the scope of the present investigation, we speculate that at these doses T26A may saturate PGT binding sites, eliciting a maximal effect on BP reduction.

## Oral Administration of PGT Inhibitor Raises Endogenous PGE<sub>2</sub> Levels, but not Thromboxane Levels, in Awake, Ambulatory Mice

We extended these studies to the oral administration route by administering T26A in the drinking water to awake, ambulatory mice. T26A was first dissolved in pure DMSO at a concentration of 100 mM and then mixed with drinking water at a final concentration of 2 mM. In



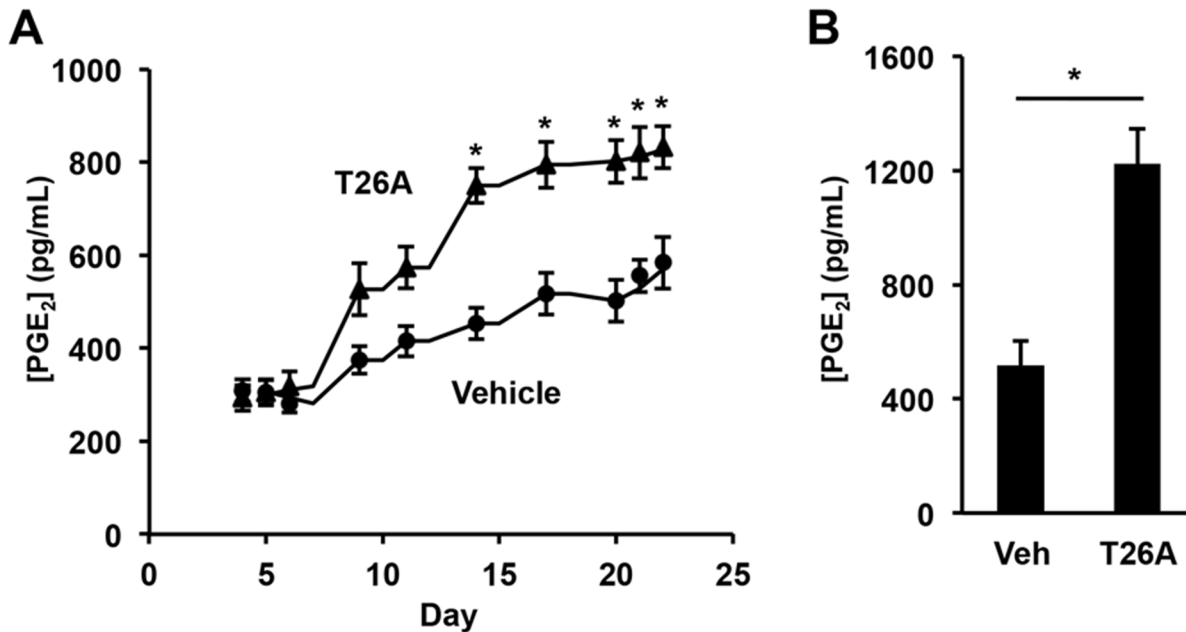

**Fig 2. Inhibition of PGT by oral T26A raises urinary and plasma PGE<sub>2</sub> concentrations in awake, ambulatory mice.** Mice were kept in metabolic cages and fed with regular water and food for 5 days. Vehicle (2% DMSO + 2% cremophor) or 2 mM T26A was added to the drinking water on day 6. Urines were collected every 24 hours and averaged as in the text. On day 25, blood was drawn by cardiac puncture. **A**, PGE<sub>2</sub> levels in urine of mice on oral vehicle or T26A. **B**, PGE<sub>2</sub> levels in plasma of mice at the termination of the study. Values are mean ± SEM, n = 6 mice each, \*p < 0.05.

doi:10.1371/journal.pone.0131735.g002

addition, 2% (v/v) cremophor was added to the mixture to make it homogenous. Vehicle-treated mice received the same 2% DMSO + 2% cremophor in the drinking water but without T26A.

T26A-treated mice had urinary PGE<sub>2</sub> concentrations that increased beginning three days after starting oral T26A and reached a stable level by day 10 (Fig 2A). Although the vehicle necessary to solubilize T26A had its own effects in these and subsequent oral experiments, in all cases the changes seen with T26A were statistically greater than those with vehicle alone. After 3 weeks, the mice were bled, at which point there was a statistically significant 2-fold increase in plasma PGE<sub>2</sub> concentrations in the T26A-treated mice compared to vehicle-treated mice (Fig 2B). These data are consistent with our previous findings of elevated urinary PGE<sub>2</sub> levels in PGT knockout mice [24] and validate that oral administration of T26A effectively inhibits PGT *in vivo*.

Measurements of the stable thromboxane A<sub>2</sub> metabolite thromboxane B<sub>2</sub> (TxB<sub>2</sub>) on the urine samples showed that T26A had no effect on this prostaglandin (S1 Fig, Inhibition of PGT by oral T26A has no effect on urinary excretion of the thromboxane metabolite TxB<sub>2</sub>), consistent with the lack of transport of thromboxane by PGT [18]

### Oral T26A Reduces Arterial BP in Hypertensive Awake, Unrestrained Mice

We next asked whether T26A could function as an oral antihypertensive agent in awake, hypertensive animals. We measured BP telemetrically in genetically hypertensive mice (BPH/2J) and their corresponding normotensive mice (BPN/3J) [29]. Radio-telemetry pressure transducers (DSI, Inc., St. Paul, MN) were implanted surgically in the carotid artery of the mice. Surgery was followed by a one-week recovery period during which baseline BP measurements were obtained. Thereafter, T26A or vehicle was added to the drinking water.

In hypertensive mice with a baseline mean BP of 145 mm Hg, T26A reduced mean BP to 120 mm Hg, with statistical significance against vehicle-treated mice achieved within 5 days

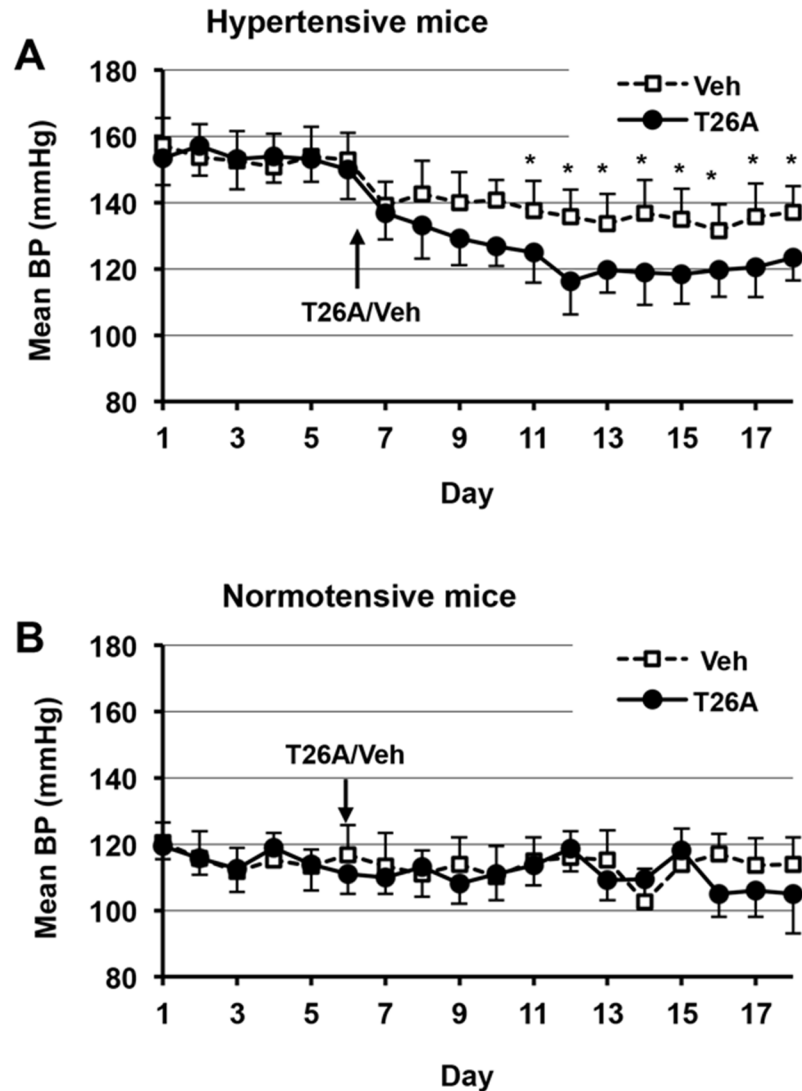

**Fig 3. Oral T26A reduces arterial blood pressure (BP) in awake, ambulatory hypertensive mice.** Genetically hypertensive mice (BPH/2J) and their normotensive controls (BPN/3J) were instrumented with telemetric BP sensors inserted in the carotid artery. From days 0–5 post-operatively, the mice were given normal chow and drinking water. Starting on day 6, the mice were switched to either vehicle (2% DMSO + 2% cremophor) or 2 mM T26A in the drinking water for an additional 13 days. Arterial BP was monitored radiotelemetrically and recorded every 3 hours. For each mouse, the daily mean BP was taken as the mean of the 8 PB measurements during that day. Values are the average of such daily mean BPs from 4 mice in each group. Bars are SEM. **A**, Effect of oral vehicle or T26A on BP in hypertensive (BPH/2J) mice. **B**, Effect of oral vehicle or T26A on BP in normotensive (BPN/3J) mice. \*  $P < 0.05$ .

doi:10.1371/journal.pone.0131735.g003

(Fig 3A). Of interest, in normotensive mice, T26A did not produce a statistically significant reduction of mean BP (Fig 3B).

### Inhibition of PGT Increases Renal Sodium Excretion in Awake, Unrestrained Mice

To test the hypothesis that, by increasing plasma PG levels, orally administered T26A induces renal natriuresis and diuresis, we measured urine volumes and sodium concentrations collected for the experiments shown in Fig 3. We averaged values obtained over the 3 days immediately

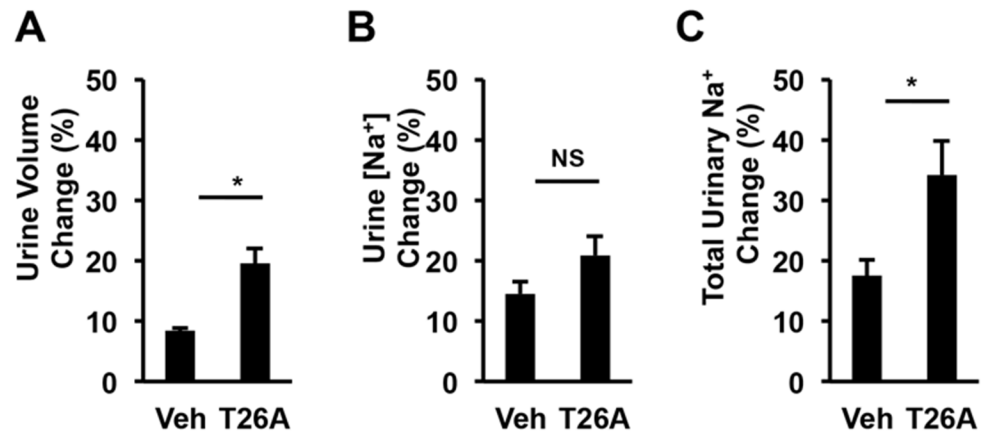

**Fig 4. Oral T26A increases urinary water and sodium excretion in awake, ambulatory mice.** As in Fig 2, C57BL/6 mice were kept in metabolic cages and fed with regular water and food for 5 days. Vehicle (2% DMSO + 2% cremophor) or 2 mM T26A was added to the drinking water on day 6. Urines were collected every 24 hours. For each mouse, daily urine volume, urinary sodium concentration, and total sodium excretion were calculated as the average of the last three equilibration (control) days and of the first three experimental days. Percent changes were calculated as per Methods. **A**, Percent change in daily urine volume from vehicle or T26A. **B**, Percent change in urinary sodium concentration. **C**, Percent change in total urinary sodium excretion. Values are mean  $\pm$  SEM,  $n = 6$  mice each, \* $p < 0.05$ , NS, not significant.

doi:10.1371/journal.pone.0131735.g004

preceding T26A administration, and also over the first 3 days of oral T26A administration. Fig 4 shows that, compared to vehicle-treated control animals, oral administration of T26A induced a statistically significant 80% increase in daily urine volume (Fig 4A); a non-statistically significant increase in urinary sodium concentration of 35% (Fig 4B); and a statistically significant increase of 100% in daily total sodium output (Fig 4C). Thus, inhibiting PGT with oral T26A induces diuresis and natriuresis.

### Inhibition of PGT Increases Net Release of PGE<sub>2</sub> from Mouse Aorta and Induces Vascular Relaxation in Mouse Aortic Rings

Using cell culture model systems, we have advanced the hypothesis that PGs are released on demand, bind to and activate nearby receptors, and are then taken back into the cell by PGT for purposes of enzymatic oxidative inactivation [22]. PGT is highly expressed in endothelia [30–33], raising the likelihood that PGT modulates PG inactivation in the vasculature. To address this question, we examined the effect of T26A on the net release of the representative prostaglandin PGE<sub>2</sub> from isolated mouse aortas following stimulation by arachidonic acid. T26A resulted in a significant increase in the medium PGE<sub>2</sub> concentration (vehicle:  $231 \pm 21$  SEM pg/mL/mg aorta versus T26A:  $391 \pm 34$  SEM pg/mL/mg aorta,  $n = 3$  aortas each,  $p = 0.016$ ).

We assessed whether the T26A-induced increase in net PG release has an effect on vascular resistance by measuring the constriction of isolated mouse aortic rings in response to vasoactive agents in the absence or presence of T26A. We pre-treated the rings with vehicle or T26A (0.2, 1.0, or 5  $\mu$ M), induced aortic contraction with the vasoconstrictor serotonin (5-HT, 1  $\mu$ M) [34], and then induced vasodilation with 10 nM PGE<sub>2</sub>. Fig 5A shows a representative experiment in which T26A both blunted 5-HT-induced vasoconstriction and also amplified the subsequent PGE<sub>2</sub>-induced vasodilation. Fig 5B shows that, on average, the T26A effect on 5-HT-induced vasoconstriction was dose-dependent, and that 5  $\mu$ M T26A blocked 25% of 5-HT induced vasoconstriction. Fig 5C shows that T26A also augmented PGE<sub>2</sub>-induced vasodilation in a dose-response manner, such that 5  $\mu$ M T26A enhanced the relaxation induced by PGE<sub>2</sub> by



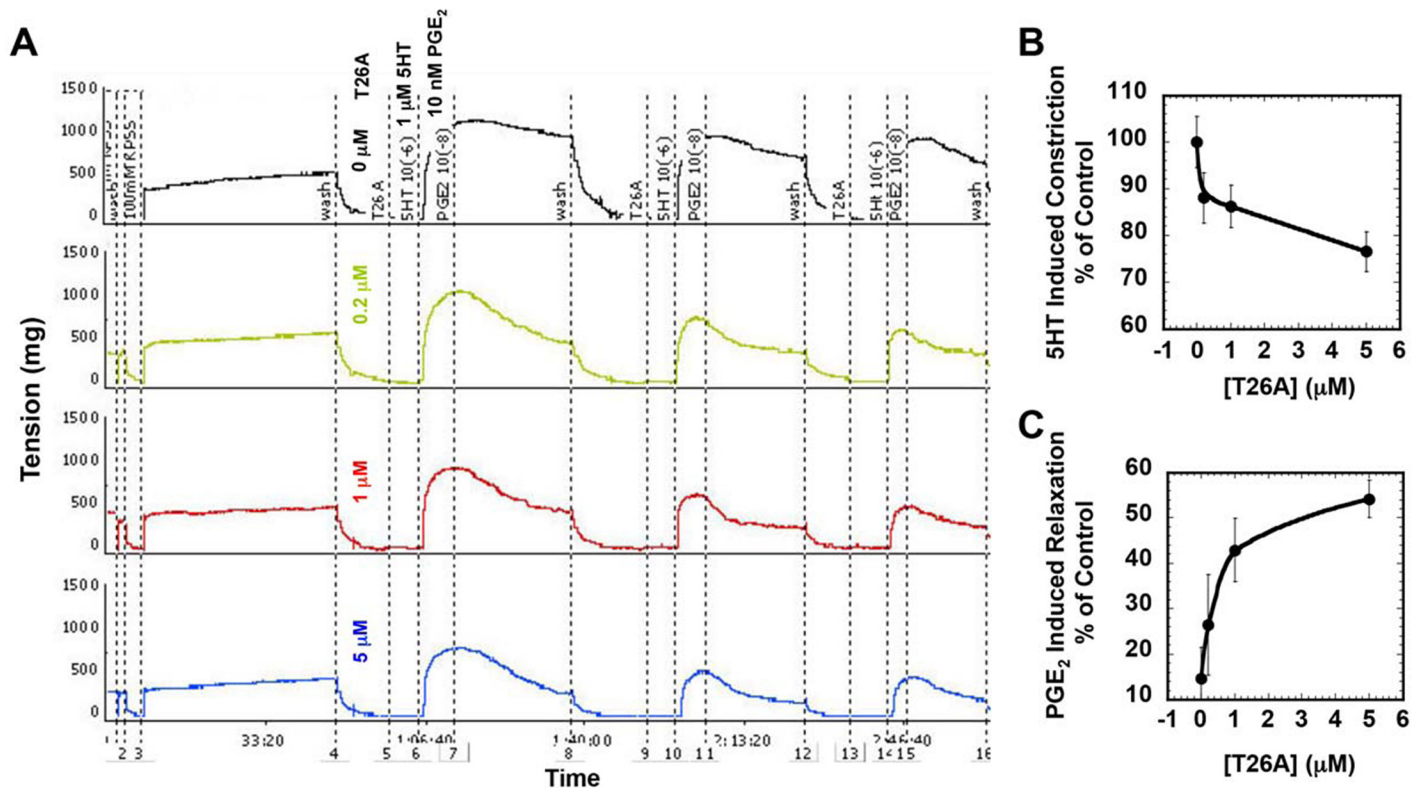

**Fig 5. T26A mitigates constriction induced by serotonin, and potentiates relaxation induced by exogenous PGE<sub>2</sub>, in isolated mouse aortic rings.** Aortic rings from C57BL/6 mice were mounted on tension transducers in bathing solutions and the tension monitored over time. After equilibration and contraction with 60 mM KCl, and a subsequent wash, 5 μL of T26A at various concentrations in ethanol was added to the incubation buffer. **A**, Representative experiment showing four rings from a single mouse aorta studied simultaneously. The final concentrations of T26A were (top to bottom) 0, (black), 0.2 μM (green), 1 μM (red), and 5 μM (blue). Five minutes after T26A addition, 1 μM 5-hydroxytryptamine (5-HT) was added to induce contraction. When the tension reached a plateau, 10 nM PGE<sub>2</sub> was added to induce relaxation. After the tension again reached stable levels, aortic rings were washed twice for about 20 minutes each, and then the sequential addition of 5-HT and PGE<sub>2</sub> was repeated twice more. **B**, the maximum tension induced by 5-HT (B), and **C**, the maximum relaxation induced by PGE<sub>2</sub>, each calculated as per Methods, were taken from 3 measures for each aortic ring. For each T26A concentration, triplicate experiments were conducted with fresh aortic rings. Values are mean ± SEM, n = 3 mice for each data point. T26A dose-dependently reduced 5-HT-induced vasoconstriction and augmented PGE<sub>2</sub>-induced vasorelaxation.

doi:10.1371/journal.pone.0131735.g005

over 50%. Thus, PGT directly regulates autocrine control of vasomotor tone by PGs in isolated mouse aortas.

### Chronic Oral T26A is Non-Toxic to Mice

To evaluate further T26A as a prototype antihypertensive agent, we monitored food intake, water intake, and body weight of mice administered T26A in the drinking water for 24 weeks. T26A did not cause any statistically significant abnormalities in any of these parameters (S2 Fig, Oral T26A does not affect food and water intake or body weight). We also conducted necropsies on these mice. S3 Fig and S4 Fig show that T26A caused no histological changes in the heart, lung, kidney, or gastrointestinal tract (S3 Fig, Histology of lung, heart and kidney; S4 Fig, Histology of the intestinal tract).

### Discussion

The main findings are that inhibiting the PG transporter PGT with the small-molecule inhibitor T26A lowers BP in hypertensive rats and mice. Additional data suggest at least two

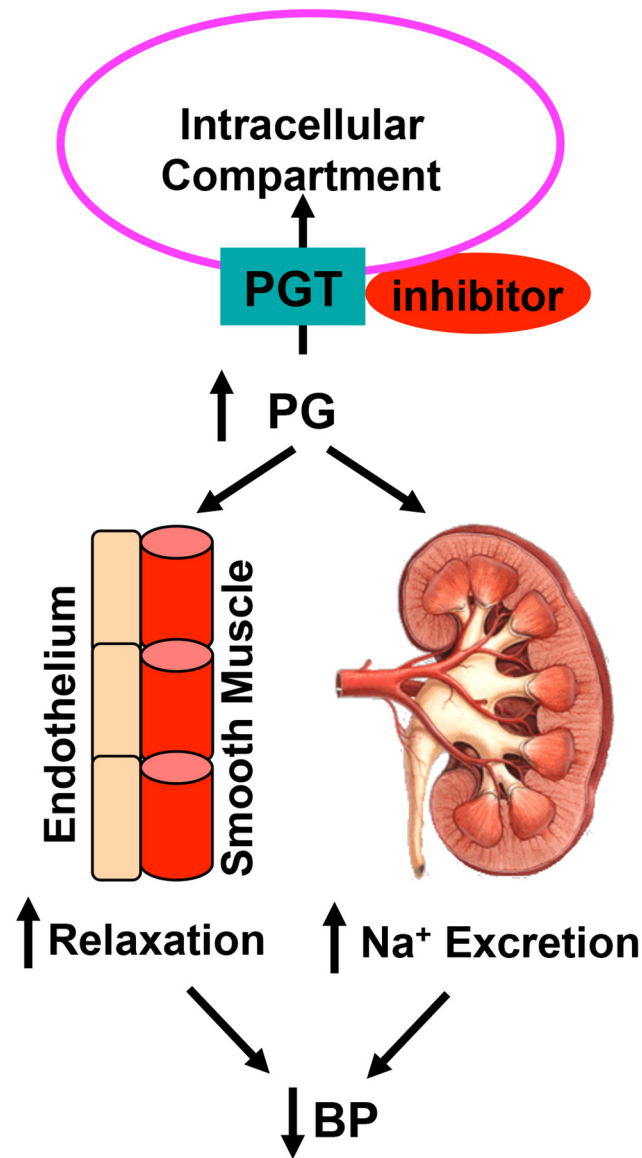

**Fig 6. Proposed model by which T26A may reduce BP.** Inhibition of PGT-mediated PG reuptake results in increased extracellular PGs. The PGs, in turn, may induce vascular relaxation and stimulate sodium excretion, both of which would reduce BP.

doi:10.1371/journal.pone.0131735.g006

mechanisms for this effect. First, in isolated mouse aortas, T26A increases the extracellular concentration of endogenously-formed PGE<sub>2</sub>, consistent with the presence of an autocrine PG loop in this vessel. In these aortas, T26A also inhibits the vasoconstrictive ability of serotonin and augments the vasodepressor activity of exogenously-added PGE<sub>2</sub>. Second, in intact mice, oral T26A increases urinary excretion of PGE<sub>2</sub>, confirming PGT inhibition by the oral route, and it induces natriuresis and diuresis. Together, these data suggest that inhibiting PGT may reduce BP by a combination of vasodilation and enhanced renal sodium excretion (Fig 6).

Pressors induce the release of vasodilatory PGs from the endothelium [35–41]. This auto-crine negative feedback loop appears to be operative in hypertension, since reducing PG synthesis raises BP in hypertension [3–17]. PGT is highly expressed at the luminal membrane of

endothelia [30–33] and is therefore in an ideal location to modulate the local concentration of vasodilatory PGs. Indeed, inhibiting PGT with T26A increased net PG release by isolated mouse aortas and reduced the vasopressor action of serotonin (Fig 5). We interpret these results to be consistent with a model in which antagonizing PGT augments the autocrine vaso-depressor PG feedback loop, at least in this large vessel. These results are in accord with our recent report, using a reconstituted cell culture autocrine signaling system, that PGT controls cell-surface PGE<sub>2</sub> concentrations arising from peptide hormone stimulation and, as a result, controls PGE<sub>2</sub> access to, and activation of, autocrine PGE<sub>2</sub> (EP) receptors [42]. The present results are also consistent with a previous report in which blockade of PGT-mediated PGE<sub>2</sub> reuptake by a less potent forerunner of T26A [43] resulted in vasodilation of rat brain arterioles [44].

Despite the ability of vasoconstrictors to induce release of vasodepressor PGs in blood vessels, as described above, both hypertensive humans and rodents [45,46], including the SHR model used here [47–54], exhibit impaired production and/or signaling by vasodepressor PGs. In this regard, we found that T26A lowered arterial BP in hypertensive, but not normotensive, mice (Fig 2), and that it induced a proportionally larger reduction in arterial BP in SHR, as compared to normotensive, rats (Fig 1). These results suggest that a relative paucity of vasodepressor PGs in hypertension might be ameliorated, at least in part, by blocking PG metabolism. Additional experiments beyond the scope of the present investigation will be required to address this hypothesis in detail.

It is important to note that the strong vasoconstrictor thromboxane A<sub>2</sub> is not transported by PGT [18], and that inhibiting PGT with T26A did not change systemic thromboxane levels as judged by urinary excretion (S1 Fig, Inhibition of PGT by oral T26A has no effect on urinary excretion of the thromboxane metabolite TxB<sub>2</sub>). On the other hand, PGE<sub>2</sub>, PGF<sub>2 $\alpha$</sub> , PGD<sub>2</sub>, and PGI<sub>2</sub> are all transported by PGT [18–21]. Although only the representative PGE<sub>2</sub> among these four PGs was measured here, ambient levels of the other three PGs would be expected to similarly increase upon inhibiting PGT. Of the four remaining PGs, only PGF<sub>2 $\alpha$</sub>  is vasoconstrictive [55,56].

The remaining PGs transported by PGT are vasodepressors. Although the PGE<sub>2</sub> receptors EP<sub>1</sub> and EP<sub>3</sub> are vasoconstrictive in mice, the EP<sub>2</sub> and EP<sub>4</sub> receptors are vasodepressive [27]; experiments using PGE<sub>2</sub> synthase knockout mice subjected to salt-loading, angiotensin II, or aldosterone-induced hypertension indicate that endogenous PGE<sub>2</sub> is, in the aggregate, anti-hypertensive [27]; and exogenous PGE<sub>2</sub> lowers arterial BP through both vasodepressor and natriuretic effects in experimental animals and human subjects [57–64]. PGD<sub>2</sub> causes either mild vasodilation or has no effect on BP in rats and humans [45,57,65]. Finally, PGI<sub>2</sub> is an extremely potent vasodilator [66], and mice with disrupted PGI<sub>2</sub> signaling develop hypertension when salt loaded [67,68]. Thus, in the aggregate it appears that the antihypertensive actions of PGE<sub>2</sub>, PGD<sub>2</sub>, and PGI<sub>2</sub> prevail over the vasoconstrictive actions of PGF<sub>2 $\alpha$</sub>  when PGT is inhibited.

The combination of aortic constriction (Fig 5) and renal diuresis and natriuresis (Fig 4) induced by T26A is of interest. In treating hypertension, vasodilators alone often induce intense renal Na<sup>+</sup> retention [69,70], whereas diuretics alone often induce intense vasoconstriction [71]. Each of these reciprocal compensations reduces the effectiveness of the primary strategy. The apparently dual action of T26A is reminiscent of that seen with the highly successful angiotensin converting enzyme inhibitors [72–74].

The use of two hypertension animal model systems allowed us to examine changes in BP from T26A that was given via two separate administration routes over two disparate time frames in two distinct rodent species. Moreover, the so-called Schlager BPH/2J mouse is genetically hypertensive primarily from excess sympathetic nervous activity [75], whereas the SHR

rat is a normal-renin, relatively sodium independent model in which CNS, neurohumoral, renal, and cellular abnormalities appear to play roles [76]. We found that raising endogenous PGs by inhibiting PGT lowered arterial BP in both of these rodent models (Figs 1 and 3). The rats were studied acutely following intravenous injection, a drug delivery method known to generally yield a sharp plasma peak followed by a trough. It is therefore likely that the T26A-induced decrease in BP in normotensive rats was due to transiently high plasma levels. In contrast, oral delivery, especially in a continuous delivery mode like drinking water, would be predicted to produce lower, albeit more sustained, plasma concentrations, and thus would probably not reach plasma levels sufficient to induce a drop in BP in normotensive animals. Since the etiology of human essential hypertension is multi-factorial, including renal sodium retention and excessive vascular constriction [77,78], our results in these two distinct models of hypertension suggest that PGT inhibition may be broadly applicable to many forms of this disease.

One *a priori* concern with inhibiting PGT in humans might be that the physiological actions of PGs are myriad [79] and therefore the approach might adversely influence multiple physiological pathways. Surprisingly, appropriately rescued PGT knockout mice survive patent ductus arteriosus at birth and appear normal thereafter [24]. Similarly, mice treated for more than 3 weeks with systemic T26A exhibited no visible phenotypic abnormalities (S2 Fig, Oral T26A does not affect food and water intake or body weight; S3 Fig, Histology of lung, heart and kidney; S4 Fig, Histology of the intestinal tract). Humans null at both alleles of the PGT locus exhibit no symptoms until puberty, at which point males, but not females, develop a rather limited phenotype consisting of thickened cephalic skin, digital clubbing, and periosteal calcification [80–88]. These seemingly minor clinical consequences of inhibiting PGT either genetically or pharmacologically in mice or humans support our pursuit of PGT as a prospective drug target.

As of 2010, high blood pressure ranked as the leading single risk factor in the “global burden of disease” analysis [89]. Despite the seemingly large number of antihypertensive agents available, and despite the belief by many clinicians that hypertension can be typically well managed with currently available drugs, in fact the majority of patients with hypertension who are treated with drugs do not attain goal BP levels, and there is an unmet need to find new antihypertensive drugs that are safe, reduce BP effectively, and provide target-organ protection [90]. Aliskiren, the most recent new first-in-class drug for hypertension, was approved seven years ago, and the last new molecule, azilsartan, was approved three years ago. In contrast, in the same time period the FDA has approved five novel anticoagulants (with three different modes of action), four new antiplatelet agents (two different modes of action), and five new molecules for the treatment of pulmonary hypertension (four modes of action) [91]. Here we have provided a demonstration that pharmacologically inhibiting the PG transporter PGT reduces BP by two modes of action in hypertensive mice and rats. PGT bears further exploration as an attractive new drug target in human essential hypertension.

## Supporting Information

**S1 Fig. Inhibition of PGT by oral T26A has no effect on urinary excretion of the thromboxane metabolite TxB2.**

(PDF)

**S2 Fig. Oral T26A does not affect food and water intake or body weight.**

(PDF)

**S3 Fig. Histology of lung, heart and kidney.**

(PDF)

#### S4 Fig. Histology of the intestinal tract. (PDF)

### Acknowledgments

This paper is dedicated to the memory of John B. Stokes, 3<sup>rd</sup> (March 26, 1944 –August 13, 2012), who taught one of us (VLS) caringly and comprehensively about prostaglandins, the kidney, and the craft of science. We thank Mark Duranski for technical assistance with the ambulatory telemetric blood pressure measurements in mice.

### Author Contributions

Conceived and designed the experiments: YC VLS. Performed the experiments: YC JFJ YS. Analyzed the data: YC JFJ YS VLS. Contributed reagents/materials/analysis tools: YC MPL MJC DJL VLS. Wrote the paper: YC VLS.

### References

1. Smyth EM, Grosser T, Wang M, Yu Y, FitzGerald GA (2009) Prostanoids in health and disease. *J Lipid Res* 50 Suppl: S423–428. doi: [10.1194/jlr.R800094-JLR200](https://doi.org/10.1194/jlr.R800094-JLR200) PMID: [19095631](https://pubmed.ncbi.nlm.nih.gov/19095631/)
2. Smith WL, Urade Y, Jakobsson PJ (2011) Enzymes of the cyclooxygenase pathways of prostanoid biosynthesis. *Chem Rev* 111: 5821–5865. doi: [10.1021/cr2002992](https://doi.org/10.1021/cr2002992) PMID: [21942677](https://pubmed.ncbi.nlm.nih.gov/21942677/)
3. Johnson AG, Nguyen TV, Day RO (1994) Do nonsteroidal anti-inflammatory drugs affect blood pressure? A meta-analysis. *Ann Intern Med* 121: 289–300. PMID: [8037411](https://pubmed.ncbi.nlm.nih.gov/8037411/)
4. Pope JE, Anderson JJ, Felson DT (1993) A meta-analysis of the effects of nonsteroidal anti-inflammatory drugs on blood pressure. *Arch Intern Med* 153: 477–484. PMID: [8435027](https://pubmed.ncbi.nlm.nih.gov/8435027/)
5. Gertz BJ, Krupa D, Bolognese JA, Sperling RS, Reicin A (2002) A comparison of adverse renovascular experiences among osteoarthritis patients treated with rofecoxib and comparator non-selective non-steroidal anti-inflammatory agents. *Curr Med Res Opin* 18: 82–91. PMID: [12017215](https://pubmed.ncbi.nlm.nih.gov/12017215/)
6. Hinz B, Dormann H, Brune K (2006) More pronounced inhibition of cyclooxygenase 2, increase in blood pressure, and reduction of heart rate by treatment with diclofenac compared with celecoxib and rofecoxib. *Arthritis Rheum* 54: 282–291. PMID: [16385545](https://pubmed.ncbi.nlm.nih.gov/16385545/)
7. Schwartz JI, Vandormael K, Malice MP, Kalyani RN, Lasseter KC, Holmes GB, et al. (2002) Comparison of rofecoxib, celecoxib, and naproxen on renal function in elderly subjects receiving a normal-salt diet. *Clin Pharmacol Ther* 72: 50–61. PMID: [12152004](https://pubmed.ncbi.nlm.nih.gov/12152004/)
8. Solomon SD, Pfeffer MA, McMurray JJ, Fowler R, Finn P, Levin B, et al. (2006) Effect of celecoxib on cardiovascular events and blood pressure in two trials for the prevention of colorectal adenomas. *Circulation* 114: 1028–1035. PMID: [16943394](https://pubmed.ncbi.nlm.nih.gov/16943394/)
9. Chan CC, Reid CM, Aw TJ, Liew D, Haas SJ, Krum H (2009) Do COX-2 inhibitors raise blood pressure more than nonselective NSAIDs and placebo? An updated meta-analysis. *J Hypertens* 27: 2332–2341. doi: [10.1097/HJH.0b013e3283310dc9](https://doi.org/10.1097/HJH.0b013e3283310dc9) PMID: [19887957](https://pubmed.ncbi.nlm.nih.gov/19887957/)
10. Aw TJ, Haas SJ, Liew D, Krum H (2005) Meta-analysis of cyclooxygenase-2 inhibitors and their effects on blood pressure. *Arch Intern Med* 165: 490–496. PMID: [15710786](https://pubmed.ncbi.nlm.nih.gov/15710786/)
11. Zhang J, Ding EL, Song Y (2006) Adverse effects of cyclooxygenase 2 inhibitors on renal and arrhythmia events: meta-analysis of randomized trials. *JAMA* 296: 1619–1632. PMID: [16968832](https://pubmed.ncbi.nlm.nih.gov/16968832/)
12. Levy JV (1977) Changes in systolic arterial blood pressure in normal and spontaneously hypertensive rats produced by acute administration of inhibitors of prostaglandin biosynthesis. *Prostaglandins* 13: 153–160. PMID: [841102](https://pubmed.ncbi.nlm.nih.gov/841102/)
13. Hocherl K, Endemann D, Kammerl MC, Grobecker HF, Kurtz A (2002) Cyclo-oxygenase-2 inhibition increases blood pressure in rats. *Br J Pharmacol* 136: 1117–1126. PMID: [12163344](https://pubmed.ncbi.nlm.nih.gov/12163344/)
14. Qi Z, Hao CM, Langenbach RI, Breyer RM, Redha R, Morrow JD, et al. (2002) Opposite effects of cyclooxygenase-1 and -2 activity on the pressor response to angiotensin II. *J Clin Invest* 110: 61–69. PMID: [12093889](https://pubmed.ncbi.nlm.nih.gov/12093889/)
15. Yao B, Harris RC, Zhang MZ (2005) Interactions between 11beta-hydroxysteroid dehydrogenase and COX-2 in kidney. *Am J Physiol Regul Integr Comp Physiol* 288: R1767–1773. PMID: [15718388](https://pubmed.ncbi.nlm.nih.gov/15718388/)



16. Ye W, Zhang H, Hillas E, Kohan DE, Miller RL, Nelson RD, et al. (2006) Expression and function of COX isoforms in renal medulla: evidence for regulation of salt sensitivity and blood pressure. *Am J Physiol Renal Physiol* 290: F542–549. PMID: [16189289](#)
17. Yu Y, Stubbe J, Ibrahim S, Song WL, Smyth EM, Funk CD, et al. (2010) Cyclooxygenase-2-dependent prostacyclin formation and blood pressure homeostasis: targeted exchange of cyclooxygenase isoforms in mice. *Circ Res* 106: 337–345. doi: [10.1161/CIRCRESAHA.109.204529](#) PMID: [19940265](#)
18. Kanai N, Lu R, Satriano JA, Bao Y, Wolkoff AW, Schuster VL (1995) Identification and characterization of a prostaglandin transporter. *Science* 268: 866–869. PMID: [7754369](#)
19. Lu R, Kanai N, Bao Y, Schuster VL (1996) Cloning, in vitro expression, and tissue distribution of a human prostaglandin transporter cDNA (hPGT). *J Clin Invest* 98: 1142–1149. PMID: [8787677](#)
20. Pucci ML, Bao Y, Chan B, Itoh S, Lu R, Copeland NG, et al. (1999) Cloning of mouse prostaglandin transporter PGT cDNA: species-specific substrate affinities. *Am J Physiol* 277: R734–R741. PMID: [10484490](#)
21. Nomura T, Lu R, Pucci ML, Schuster VL (2002) Prostacyclin is transported by the prostaglandin transporter PGT. *Journal of the American Society of Nephrology* 13: 66A.
22. Nomura T, Lu R, Pucci ML, Schuster VL (2004) The two-step model of prostaglandin signal termination: in vitro reconstitution with the prostaglandin transporter and prostaglandin 15 dehydrogenase. *Mol Pharmacol* 65: 973–978. PMID: [15044627](#)
23. Schuster VL (1998) Molecular mechanisms of prostaglandin transport. *Annu Rev Physiol* 60: 221–242. PMID: [9558462](#)
24. Chang HY, Locker J, Lu R, Schuster VL (2010) Failure of postnatal ductus arteriosus closure in prostaglandin transporter-deficient mice. *Circulation* 121: 529–536. doi: [10.1161/CIRCULATIONAHA.109.862946](#) PMID: [20083684](#)
25. Chi Y, Min J, Jasmin JF, Lisanti MP, Chang YT, Schuster VL (2011) Development of a high-affinity inhibitor of the prostaglandin transporter. *J Pharmacol Exp Ther* 339: 633–641. doi: [10.1124/jpet.111.181354](#) PMID: [21849625](#)
26. Whitesall SE, Hoff JB, Vollmer AP, D'Alecy LG (2004) Comparison of simultaneous measurement of mouse systolic arterial blood pressure by radiotelemetry and tail-cuff methods. *Am J Physiol Heart Circ Physiol* 286: H2408–2415. PMID: [14962829](#)
27. Yang T (2010) Role of PGE2 in blood pressure regulation. *Current Hypertension Reviews* 6: 10.
28. Schuster VL (2002) Prostaglandin transport. *Prostaglandins Other Lipid Mediat* 68–69: 633–647. PMID: [12432949](#)
29. Schlager G, Sides J (1997) Characterization of hypertensive and hypotensive inbred strains of mice. *Lab Anim Sci* 47: 288–292. PMID: [9241632](#)
30. Topper JN, Cai J, Stavrakis G, Anderson KR, Woolf EA, Sampson BA, et al. (1998) Human prostaglandin transporter gene (hPGT) is regulated by fluid mechanical stimuli in cultured endothelial cells and expressed in vascular endothelium in vivo. *Circulation* 98: 2396–2403. PMID: [9832484](#)
31. Pai JT, Ruoslahti E (2005) Identification of endothelial genes up-regulated in vivo. *Gene* 347: 21–33. PMID: [15715960](#)
32. Ulrich D, Ulrich F, Silny J, Unglaub F, Pallua N (2006) [Chiparray-based identification of gene expression in HUVECs treated with low frequency electric fields]. *Handchir Mikrochir Plast Chir* 38: 149–155. PMID: [16883499](#)
33. McCormick SM, Eskin SG, McIntire LV, Teng CL, Lu CM, Russell CG, et al. (2001) Dna microarray reveals changes in gene expression of shear stressed human umbilical vein endothelial cells. *Proceedings of the National Academy of Sciences of the United States of America* 98: 8955–8960. PMID: [11481467](#)
34. Rapport MM, Green AA, Page IH (1948) Partial purification of the vasoconstrictor in beef serum. *J Biol Chem* 174: 735–741. PMID: [18865641](#)
35. Nadler J, Zipser RD, Coleman R, Horton R (1983) Stimulation of renal prostaglandins by pressor hormones in man: comparison of prostaglandin E2 and prostacyclin (6 keto prostaglandin F1 alpha). *J Clin Endocrinol Metab* 56: 1260–1265. PMID: [6341391](#)
36. Diz DI, Baer PG, Nasjletti A (1983) Angiotensin II-induced hypertension in the rat. Effects on the plasma concentration, renal excretion, and tissue release of prostaglandins. *J Clin Invest* 72: 466–477. PMID: [6575977](#)
37. Lennon EA, Poyser NL (1986) Production of prostaglandins I2, E2 and F2 alpha by blood vessels of normotensive and hypertensive, male and female rats. *Prostaglandins Leukot Med* 25: 71–89. PMID: [3547415](#)



38. Nolan RD, Dusting GJ, Martin TJ (1981) Phospholipase inhibition and the mechanism of angiotensin-induced prostacyclin release from rat mesenteric vasculature. *Biochem Pharmacol* 30: 2121–2125. PMID: [7028038](#)
39. Blumberg AL, Denny SE, Marshall GR, Needleman P (1977) Blood vessel-hormone interactions: angiotensin, bradykinin, and prostaglandins. *Am J Physiol* 232: H305–310. PMID: [842686](#)
40. Needleman P, Marshall GR, Sobel BE (1975) Hormone interactions in the isolated rabbit heart. Synthesis and coronary vasomotor effects of prostaglandins, angiotensin, and bradykinin. *Circ Res* 37: 802–808. PMID: [1192572](#)
41. Zhang DJ, Chen LH, Zhang YH, Yang GR, Dou D, Gao YS, et al. (2010) Enhanced pressor response to acute Ang II infusion in mice lacking membrane-associated prostaglandin E2 synthase-1. *Acta Pharmacol Sin* 31: 1284–1292. doi: [10.1038/aps.2010.99](#) PMID: [20871624](#)
42. Chi Y, Suadicani SO, Schuster VL (2014) Regulation of prostaglandin EP1 and EP4 receptor signaling by carrier-mediated ligand reuptake. *Pharmacol Res Perspect* 2: e00051. doi: [10.1002/prp2.51](#) PMID: [25505603](#)
43. Chi Y, Khersonsky SM, Chang YT, Schuster VL (2006) Identification of a new class of prostaglandin transporter inhibitors and characterization of their biological effects on prostaglandin E2 transport. *J Pharmacol Exp Ther* 316: 1346–1350. PMID: [16269530](#)
44. Gordon GR, Choi HB, Rungta RL, Ellis-Davies GC, MacVicar BA (2008) Brain metabolism dictates the polarity of astrocyte control over arterioles. *Nature* 456: 745–749. doi: [10.1038/nature07525](#) PMID: [18971930](#)
45. Smith MC, Dunn MJ (1985) The role of prostaglandins in human hypertension. *Am J Kidney Dis* 5: A32–39. PMID: [3922218](#)
46. Uehara Y, Ishimitsu T, Kawabata Y, Matsuoka H, Ishii M, Sugimoto T (1992) Abnormal response of urinary eicosanoid system to norepinephrine infusion in patients with essential hypertension. *Prostaglandins Leukot Essent Fatty Acids* 46: 99–104. PMID: [1502257](#)
47. Paliege A, Pasumarthy A, Mizel D, Yang T, Schnermann J, Bachmann S (2006) Effect of apocynin treatment on renal expression of COX-2, NOS1, and renin in Wistar-Kyoto and spontaneously hypertensive rats. *Am J Physiol Regul Integr Comp Physiol* 290: R694–700. PMID: [16467505](#)
48. Good DW, Cafilisch CR, George T (1995) Prostaglandin E2 regulation of ion transport is absent in medullary thick ascending limbs from SHR. *Am J Physiol* 269: F47–54. PMID: [7631831](#)
49. Jaiswal N, Jaiswal RK, Tallant EA, Diz DI, Ferrario CM (1993) Alterations in prostaglandin production in spontaneously hypertensive rat smooth muscle cells. *Hypertension* 21: 900–905. PMID: [8505098](#)
50. Yoshikawa H, Fukuda K, Baba A, Nishio H, Ueyama T, Yoshikawa A, et al. (1990) Deficient activity of nucleotide binding regulatory protein coupled with PGE2 receptor in renal medulla of spontaneously hypertensive rats. *Am J Hypertens* 3: 230–233. PMID: [2108707](#)
51. Reid GM, Appel RG, Dunn MJ (1988) Papillary collecting tubule synthesis of prostaglandin E2 in Dahl rats. *Hypertension* 11: 179–184. PMID: [3422633](#)
52. Martineau A, Robillard M, Falardeau P (1984) Defective synthesis of vasodilator prostaglandins in the spontaneously hypertensive rat. *Hypertension* 6: 1161–1165. PMID: [6373595](#)
53. Limas C, Goldman P, Limas CJ, Iwai J (1981) Effect of salt on prostaglandin metabolism in hypertension-prone and-resistant Dahl rats. *Hypertension* 3: 219–224. PMID: [7216376](#)
54. Sustarsic DL, McPartland RP, Rapp JP (1981) Developmental patterns of blood pressure and urinary protein, kallikrein, and prostaglandin E2 in Dahl salt-hypertension-susceptible rats. *J Lab Clin Med* 98: 599–606. PMID: [6912875](#)
55. Yu Y, Lucitt MB, Stubbe J, Cheng Y, Friis UG, Hansen PB, et al. (2009) Prostaglandin F2alpha elevates blood pressure and promotes atherosclerosis. *Proc Natl Acad Sci U S A* 106: 7985–7990. doi: [10.1073/pnas.0811834106](#) PMID: [19416858](#)
56. Liston TE, Roberts LJ 2nd (1985) Transformation of prostaglandin D2 to 9 alpha, 11 beta-(15S)-trihydroxyprosta-(5Z,13E)-dien-1-oic acid (9 alpha, 11 beta-prostaglandin F2): a unique biologically active prostaglandin produced enzymatically in vivo in humans. *Proc Natl Acad Sci U S A* 82: 6030–6034. PMID: [3862115](#)
57. Armstrong JM, Boura AL, Hamberg M, Samuelsson B (1976) A comparison of the vasodepressor effects of the cyclic effects of the cyclic endoperoxides PGG<sub>2</sub> and PGH<sub>2</sub> with those of PGD<sub>2</sub> and PGE<sub>2</sub> in hypertensive and normotensive rats. *Eur J Pharmacol* 39: 251–258. PMID: [976320](#)
58. Schaaf TK, Hess HJ (1979) Synthesis and biological activity of carboxyl-terminus modified prostaglandin analogues. *J Med Chem* 22: 1340–1346. PMID: [533881](#)
59. Raymond KH, Lifschitz MD (1986) Effect of prostaglandins on renal salt and water excretion. *Am J Med* 80: 22–33.

60. Swan CE, Breyer RM (2011) Prostaglandin E2 modulation of blood pressure homeostasis: studies in rodent models. *Prostaglandins Other Lipid Mediat* 96: 10–13. doi: [10.1016/j.prostaglandins.2011.07.001](https://doi.org/10.1016/j.prostaglandins.2011.07.001) PMID: [21801847](https://pubmed.ncbi.nlm.nih.gov/21801847/)
61. Simpson LL (1974) The effect of prostaglandin E2 on the arterial blood pressure of normotensive and spontaneously hypertensive rats. *Br J Pharmacol* 51: 559–564. PMID: [4451765](https://pubmed.ncbi.nlm.nih.gov/4451765/)
62. Audoly LP, Tilley SL, Goulet J, Key M, Nguyen M, Stock JL, et al. (1999) Identification of specific ep receptors responsible for the hemodynamic effects of pge2. *American Journal of Physiology* 277: H924–930. PMID: [10484412](https://pubmed.ncbi.nlm.nih.gov/10484412/)
63. Kennedy CR, Zhang Y, Brandon S, Guan Y, Coffee K, Funk CD, et al. (1999) Salt-sensitive hypertension and reduced fertility in mice lacking the prostaglandin EP2 receptor. *Nat Med* 5: 217–220. PMID: [9930871](https://pubmed.ncbi.nlm.nih.gov/9930871/)
64. Eklund B, Carlson LA (1980) Central and peripheral circulatory effects and metabolic effects of different prostaglandins given I.V. to man. *Prostaglandins* 20: 333–347. PMID: [7413995](https://pubmed.ncbi.nlm.nih.gov/7413995/)
65. Heavey DJ, Lumley P, Barrow SE, Murphy MB, Humphrey PP, Dollery CT (1984) Effects of intravenous infusions of prostaglandin D2 in man. *Prostaglandins* 28: 755–767. PMID: [6596653](https://pubmed.ncbi.nlm.nih.gov/6596653/)
66. Vane JR, Botting RM (1995) Pharmacodynamic profile of prostacyclin. *Am J Cardiol* 75: 3A–10A. PMID: [7840052](https://pubmed.ncbi.nlm.nih.gov/7840052/)
67. Francois H, Athirakul K, Howell D, Dash R, Mao L, Kim HS, et al. (2005) Prostacyclin protects against elevated blood pressure and cardiac fibrosis. *Cell Metab* 2: 201–207. PMID: [16154102](https://pubmed.ncbi.nlm.nih.gov/16154102/)
68. Watanabe H, Katoh T, Eiro M, Iwamoto M, Ushikubi F, Narumiya S, et al. (2005) Effects of salt loading on blood pressure in mice lacking the prostanoid receptor gene. *Circ J* 69: 124–126. PMID: [15635218](https://pubmed.ncbi.nlm.nih.gov/15635218/)
69. Swales JD, Thurston H, Pohl JE (1972) Sodium conservation in chronic renal failure: studies using oral diazoxide. *Clin Sci* 43: 771–778. PMID: [4646273](https://pubmed.ncbi.nlm.nih.gov/4646273/)
70. Grim CE, Luft FC, Grim CM, Klotman PE, Van Huysse JW, Weinberger MH (1979) Rapid blood pressure control with minoxidil: acute and chronic effects on blood pressure, sodium excretion, and the renin-aldosterone system. *Arch Intern Med* 139: 529–533. PMID: [443947](https://pubmed.ncbi.nlm.nih.gov/443947/)
71. Vaughan ED Jr., Carey RM, Peach MJ, Ackerly JA, Ayers CR (1978) The renin response to diuretic therapy A limitation of antihypertensive potential. *Circ Res* 42: 376–381. PMID: [624143](https://pubmed.ncbi.nlm.nih.gov/624143/)
72. Azizi M, Menard J (2004) Combined blockade of the renin-angiotensin system with angiotensin-converting enzyme inhibitors and angiotensin II type 1 receptor antagonists. *Circulation* 109: 2492–2499. PMID: [15173039](https://pubmed.ncbi.nlm.nih.gov/15173039/)
73. Linz W, Wiemer G, Gohlke P, Unger T, Scholkens BA (1995) Contribution of kinins to the cardiovascular actions of angiotensin-converting enzyme inhibitors. *Pharmacol Rev* 47: 25–49. PMID: [7784479](https://pubmed.ncbi.nlm.nih.gov/7784479/)
74. Tomita K, Pisano JJ, Knepper MA (1985) Control of sodium and potassium transport in the cortical collecting duct of the rat. Effects of bradykinin, vasopressin, and deoxycorticosterone. *J Clin Invest* 76: 132–136. PMID: [4019771](https://pubmed.ncbi.nlm.nih.gov/4019771/)
75. Davern PJ, Nguyen-Huu TP, La Greca L, Abdelkader A, Head GA (2009) Role of the sympathetic nervous system in Schlager genetically hypertensive mice. *Hypertension* 54: 852–859. doi: [10.1161/HYPERTENSIONAHA.109.136069](https://doi.org/10.1161/HYPERTENSIONAHA.109.136069) PMID: [19667247](https://pubmed.ncbi.nlm.nih.gov/19667247/)
76. Sarikonda KV, Watson RE, Opara OC, Dipette DJ (2009) Experimental animal models of hypertension. *J Am Soc Hypertens* 3: 158–165. doi: [10.1016/j.jash.2009.02.003](https://doi.org/10.1016/j.jash.2009.02.003) PMID: [20409957](https://pubmed.ncbi.nlm.nih.gov/20409957/)
77. Guyton AC (1991) Blood pressure control—special role of the kidneys and body fluids. *Science* 252: 1813–1816. PMID: [2063193](https://pubmed.ncbi.nlm.nih.gov/2063193/)
78. Singh M, Mensah GA, Bakris G (2010) Pathogenesis and clinical physiology of hypertension. *Cardiol Clin* 28: 545–559. doi: [10.1016/j.ccl.2010.07.001](https://doi.org/10.1016/j.ccl.2010.07.001) PMID: [20937440](https://pubmed.ncbi.nlm.nih.gov/20937440/)
79. Holmes TJ Jr. (2011) Prostaglandins, leukotrienes, and essential fatty acids. In: Beale JMJ, Block JH, editors. *Wilson and Gisvold's Organic Medicinal and Pharmaceutical Chemistry*. 12th ed. New York: Lippincott Williams & Wilkins. pp. 868–879.
80. Guda K, Fink SP, Milne GL, Molyneaux N, Ravi L, Lewis SM, et al. (2014) Inactivating Mutation in the Prostaglandin Transporter Gene, SLCO2A1, Associated with Familial Digital Clubbing, Colon Neoplasia, and NSAID Resistance. *Cancer Prev Res (Phila)* 7: 805–812.
81. Zhang Z, He JW, Fu WZ, Zhang CQ, Zhang ZL (2014) Two novel mutations in the SLCO2A1 gene in a Chinese patient with primary hypertrophic osteoarthropathy. *Gene* 534: 421–423. doi: [10.1016/j.gene.2013.10.051](https://doi.org/10.1016/j.gene.2013.10.051) PMID: [24185079](https://pubmed.ncbi.nlm.nih.gov/24185079/)
82. Zhang Z, He JW, Fu WZ, Zhang CQ, Zhang ZL (2013) Mutations in the SLCO2A1 Gene and Primary Hypertrophic Osteoarthropathy: A Clinical and Biochemical Characterization. *The Journal of clinical endocrinology and metabolism* 98: E923–933. doi: [10.1210/jc.2012-3568](https://doi.org/10.1210/jc.2012-3568) PMID: [23509104](https://pubmed.ncbi.nlm.nih.gov/23509104/)

83. Cheng R, Li M, Guo Y, Yao Y, Gao C, Yao Z (2013) Three novel mutations in the SLCO2A1 gene in two Chinese families with primary hypertrophic osteoarthropathy. *Eur J Dermatol* 23: 636–639. doi: [10.1684/ejd.2013.2154](https://doi.org/10.1684/ejd.2013.2154) PMID: [24153155](https://pubmed.ncbi.nlm.nih.gov/24153155/)
84. Busch J, Frank V, Bachmann N, Otsuka A, Oji V, Metse D, et al. (2012) Mutations in the prostaglandin transporter SLCO2A1 cause primary hypertrophic osteoarthropathy with digital clubbing. *The Journal of investigative dermatology* 132: 2473–2476. doi: [10.1038/jid.2012.146](https://doi.org/10.1038/jid.2012.146) PMID: [22696055](https://pubmed.ncbi.nlm.nih.gov/22696055/)
85. Diggle CP, Parry DA, Logan CV, Laissue P, Rivera C, Restropo CM, et al. (2012) Prostaglandin transporter mutations cause pachydermoperiostosis with myelofibrosis. *Human mutation* 33: 1175–1181. doi: [10.1002/humu.22111](https://doi.org/10.1002/humu.22111) PMID: [22553128](https://pubmed.ncbi.nlm.nih.gov/22553128/)
86. Seifert W, Kuhnisch J, Tuysuz B, Specker C, Brouwers A, Horn D (2012) Mutations in the prostaglandin transporter encoding gene SLCO2A1 cause primary hypertrophic osteoarthropathy and isolated digital clubbing. *Human mutation* 33: 660–664. doi: [10.1002/humu.22042](https://doi.org/10.1002/humu.22042) PMID: [22331663](https://pubmed.ncbi.nlm.nih.gov/22331663/)
87. Zhang Z, Xia W, He J, Ke Y, Yue H, Wang C, et al. (2012) Exome sequencing identifies SLCO2A1 mutations as a cause of primary hypertrophic osteoarthropathy. *American journal of human genetics* 90: 125–132. doi: [10.1016/j.ajhg.2011.11.019](https://doi.org/10.1016/j.ajhg.2011.11.019) PMID: [22197487](https://pubmed.ncbi.nlm.nih.gov/22197487/)
88. Sasaki T, Niizeki H, Shimizu A, Shiohama A, Hirakiyama A, Okuyama T, et al. (2012) Identification of mutations in the prostaglandin transporter gene SLCO2A1 and its phenotype-genotype correlation in Japanese patients with pachydermoperiostosis. *Journal of dermatological science* 68: 36–44. doi: [10.1016/j.jdermsci.2012.07.008](https://doi.org/10.1016/j.jdermsci.2012.07.008) PMID: [22906430](https://pubmed.ncbi.nlm.nih.gov/22906430/)
89. Bromfield S, Muntner P (2013) High blood pressure: the leading global burden of disease risk factor and the need for worldwide prevention programs. *Curr Hypertens Rep* 15: 134–136. doi: [10.1007/s11906-013-0340-9](https://doi.org/10.1007/s11906-013-0340-9) PMID: [23536128](https://pubmed.ncbi.nlm.nih.gov/23536128/)
90. Flack JM (2007) Epidemiology and unmet needs in hypertension. *J Manag Care Pharm* 13: 2–8.
91. Paulis L, Rajkovicova R, Simko F (2015) New developments in the pharmacological treatment of hypertension: dead-end or a glimmer at the horizon? *Current hypertension reports* 17: 1–13.
